# Supplementary material for: 1H NMR-based urine metabolomics for the evaluation of kidney injury in Wistar rats by 3-MCPD
Source: Royal Society of Chemistry journal article supplement (doi:10.1039/c5tx00399g), 2016-01-01
Supplement: c5tx00399g1.pdf [file c5tx00399g1.pdf]

## Supplementary Data

### **<sup>1</sup>H NMR-based Urine Metabolomics for Evaluation of Kidney Injury on Wistar Rat by 3-MCPD**

Jian Ji<sup>1</sup>, Lijuan Zhang<sup>1</sup>, Hongxia Zhang<sup>2</sup>, Chao Sun<sup>1</sup>, Jiadi Sun<sup>1</sup>, Hui Jiang<sup>1</sup>, Mandour  
H. Abdalhai<sup>1</sup>, YinZhi Zhang<sup>1</sup>, Xiulan Sun<sup>1\*</sup>

<sup>1</sup>State Key Laboratory of Food Science and Technology, School of Food Science of  
Jiangnan University, School of Food Science Synergetic Innovation Center of Food  
Safety and Nutrition. Wuxi, Jiangsu 214122, China

<sup>2</sup>School of Foreign Studies, Shanxi University of Technology, 723000, China

First author: Jian Ji (E-mail: jijianjndx@126.com)

\*Corresponding author: Xiulan Sun (E-mail: sxlzzz@jiangnan.edu.cn)

## **MATERIALS AND METHODS**

### **1.1 Histopathology**

The largest lobe of the liver and testis from the control and treated groups was excised, fixed in 10 % formalin, processed with standard histological protocol, and cut into 4- $\mu$ m serial sections using a microtome. The deparafinized sections were stained with haematoxylin and eosin for histopathological examination.

**Figure Titles List:**

Fig.S1 Box plots and kernel density plots before and after normalization, selected methods: Row-wise normalization: Probabilistic Quotient Normalization; Data transformation: N/A; Data scaling: Pareto scaling.

Fig. S2 Organ coefficient comparison between controls and 3-MCPD treated rat (mean±SD, \*P<0.05, \*\*P<0.01)

Fig. S3 Photomicrographs of kidney and testis sections with haematoxylin-eosin observed by light microscope. Control group rats showing normal kidney (G, H) and testis (K, L) (magnification, G, K: 200×; H, L: 400×) and 3-MCPD treated rats showing testis with lesion (I, J) and testis (M, N) (magnification, I, M: 200×; J, N: 400×).

Fig. S4 Clinical chemistry comparison between controls and 3-MCPD treated rat for GAL and NAG (mean±SD, \*P<0.05, \*\*P<0.01).

Fig. S5 the permutations plot was applied for assess the risk of the current OPLS-DA model, (A) 7 days, (B) 21 days, (C) 35 days and (D) the group of 35 day VS. the groups of control, 7 days and 21 days.

**Table Titles List:**

Table S1 the pool of 68 metabolites identified in rat urine by NMR

Table S2 The fold change value selected potential biomarkers

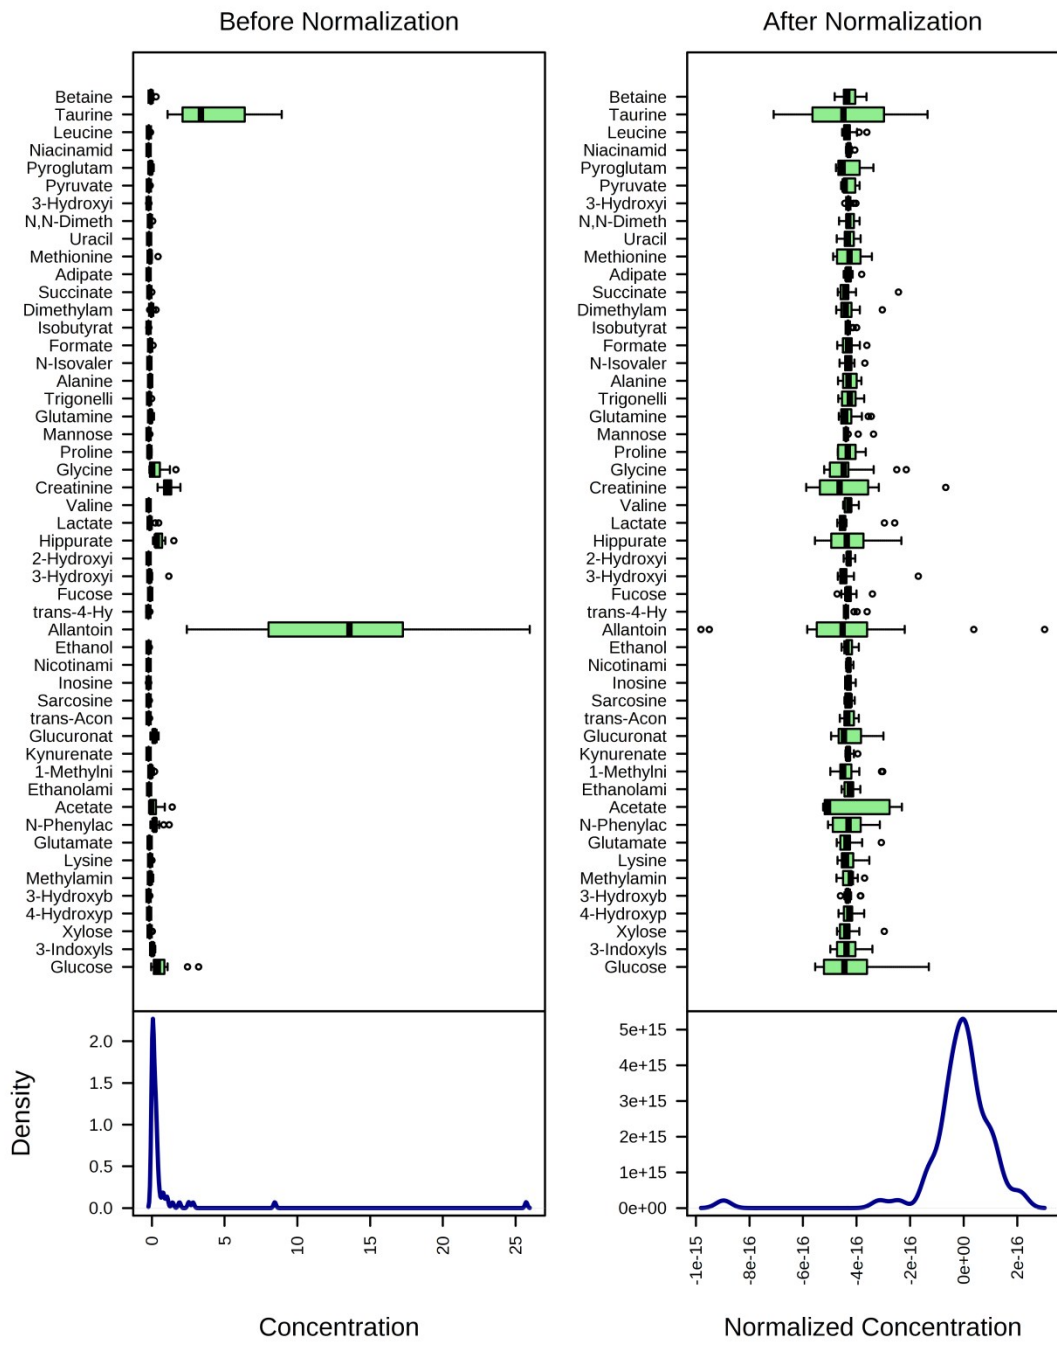

Fig.S1 Box plots and kernel density plots before and after normalization, selected methods: Row-wise normalization: Probabilistic Quotient Normalization; Data transformation: N/A; Data scaling: Pareto scaling.

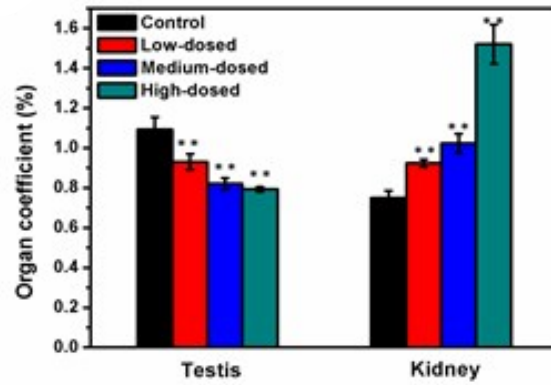

Fig. S2 Organ coefficient comparison between controls and 3-MCPD treated rat

(mean±SD, \*P<0.05, \*\*P<0.01)

We observed that the testis coefficient decreased and kidney coefficient increased significantly by the 35<sup>th</sup> day for the treated group, as shown in Fig. S2.

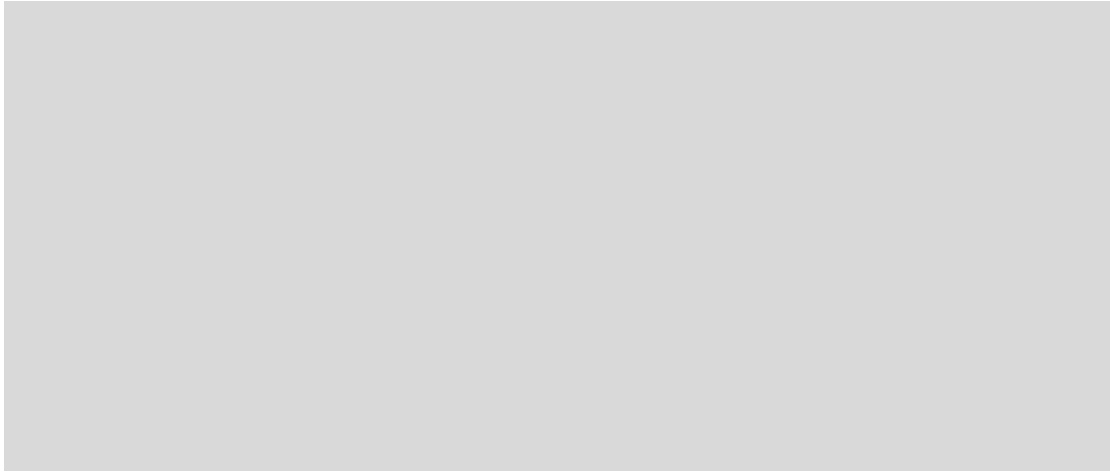

Fig. S3 Photomicrographs of kidney and testis sections with haematoxylin-eosin observed by light microscope. Control group rats showing normal kidney (G, H) and testis (K, L) (magnification, G, K: 200×; H, L: 400×) and 3-MCPD treated rats showing testis with lesion (I, J) and testis (M, N) (magnification, I, M: 200×; J, N: 400×).

The kidney histopathology of the control rat, shown in Fig. S3 G and Fig. S3 H, revealed glomerulus and kidney tubules; the complete afferent artery entering the glomerular from the vascular pole and the smooth muscle cells specialized through the granulosa cells near afferent artery walls of juxtaglomerular was observed, consistent with normal kidney<sup>1</sup>. In Fig. S3 I and Fig. S3 J, the kidney histopathology of high-dose 3-MCPD treated rat, we observed many small vesicas, elongated radiated or cystic arrangement, salient features of hydropic degeneration. Additionally, residual glomeruli with abnormal shape and incomplete form were observed in the renal cortex, surrounded by disordered granulosa cells and capillaries<sup>1</sup>. Together, these findings reveal

that 3-MCPD had significant toxic effects on rat kidney. The testis coefficient evaluation showed that the 3-MCPD caused damage to rat testis, supported by the testis histopathology. The testis histopathology of control rats showed seminiferous tubules with a large number of germ cells; sertoli cells without the central tubules and testis leydig cells within the interstitial space between seminiferous tubules, consistent with healthy testis (Fig. S3K and Fig S3L). In contrast, the testis histopathology of high-dose 3-MCPD treated rat (Fig. S3M and Fig S3 N) revealed testicular atrophy, mainly as atrophy of focal seminiferous tubules, uneven distribution of leydig cells and the disordered phenotype of the remaining seminiferous tubules, consistent with 3-MCPD having potential reproductive toxicity.

(1) Klatt, E. C. *Robbins and Cotran atlas of pathology*; Elsevier Health Sciences, 2014.

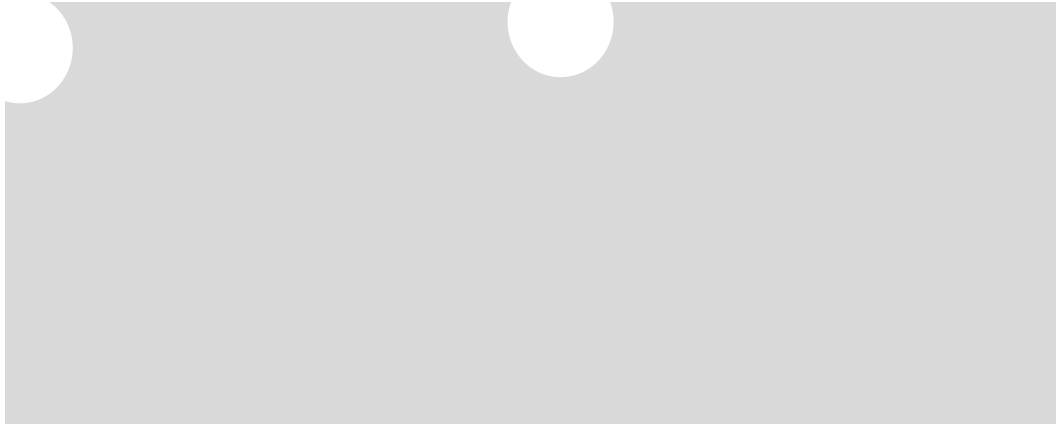

Fig. S4 Clinical chemistry comparison between controls and 3-MCPD treated rat, (D) for GAL, (E) for NAG (mean $\pm$ SD, \*P<0.05, \*\*P<0.01).

The changes in serum biochemical parameters are presented in Fig. 4D and Fig. 4E. At 7<sup>th</sup> day, the GAL ( $\beta$ -galactosidase) and NAG (N-acetyl  $\beta$ -D amino glycosidase enzymes) levels, which were related to kidney function, were significantly increased in all the treated groups, most obviously in the high-dose treated rats<sup>2</sup>

(2) Wellwood, J.; Lovell, D.; Thompson, A.; Tighe, J. *The Journal of pathology* **1976**, *118*, 171-182.



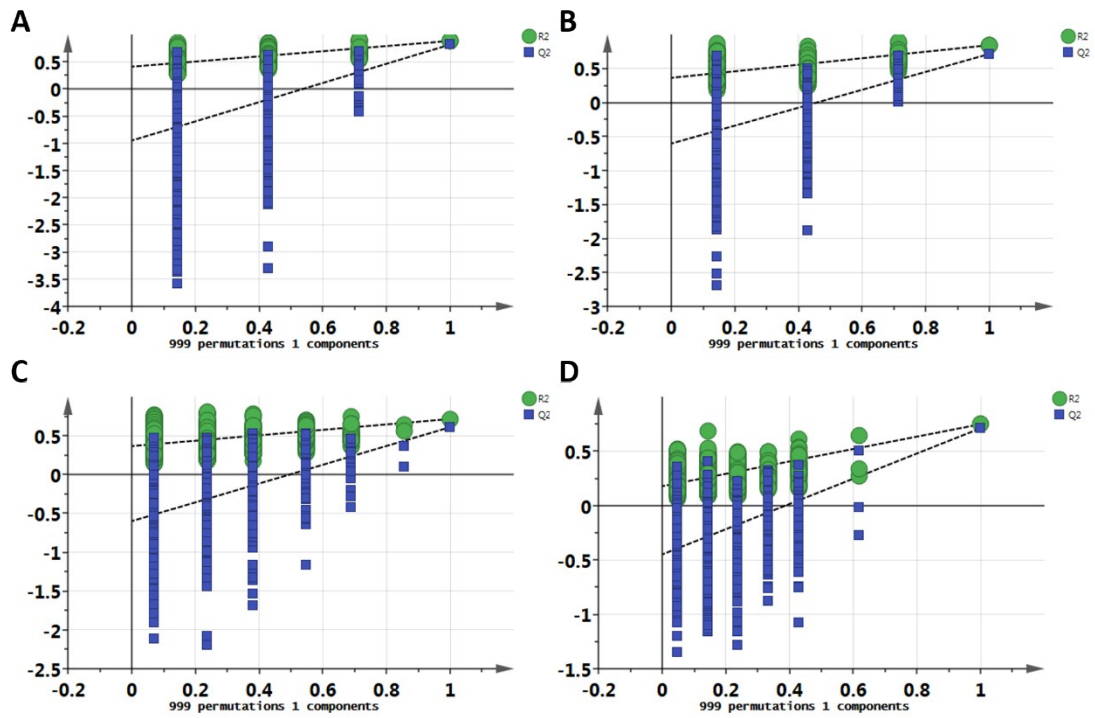

Fig. S5 the permutations plot was applied for assess the risk of the current OPLS-DA model, (A) 7 days, (B) 21 days, (C) 35 days and (D) the group of 35 day VS. the groups of control, 7 days and 21 days.

**Table S1** The pool of 68 metabolites identified in rat urine by NMR

| Classification         | Metabolites            | <sup>1</sup> H chemical shift (ppm)                           | Formula   | SMILES                          |
|------------------------|------------------------|---------------------------------------------------------------|-----------|---------------------------------|
| alcohols               | Ethanol                | 1.162, 1.174, 1.186                                           | C2H6O     | CCO                             |
|                        | Methanol               | 3.352                                                         | CH4O      | CO                              |
| amides                 | Allantoin              | 6.035                                                         | C4H6N4O3  | NC(=O)NC1NC(=O)NC1=O            |
|                        | N-Isovaleroylglycine   | 0.921, 0.932                                                  | C7H13NO3  | CC(C)CC(=O)NCC(O)=O             |
|                        | N-Phenylacetyl-glycine | 3.665, 3.741, 3.751, 7.335-7.360, 7.395-7.420                 | C10H11NO3 | OC(=O)CNC(=O)CC1=CC=CC=C1       |
|                        | Creatinine             | 3.024, 3.920                                                  | C4H7N3O   | CN1CC(=O)NC1=N                  |
|                        | Dimethylamine          | 2.713                                                         | C2H7N     | CNC                             |
|                        | Ethanolamine           | 3.127, 3.135, 3.144                                           | C2H7NO    | NCCO                            |
|                        | Methylamine            | 2.595                                                         | CH5N      | CN                              |
| amino acid derivatives | 3-Indoxylsulfate       | 7.480, 7.494, 7.680, 7.694                                    | C8H7NO4S  | OS(=O)(=O)OC1=C[NH]C2=CC=CC=C12 |
|                        | Creatine               | 3.029, 4.042                                                  | C4H9N3O2  | CN(CC(O)=O)C(N)=N               |
|                        | Hippurate              | 3.954, 3.964, 7.524, 7.537, 7.611, 7.624, 7.636, 7.815, 7.828 | C9H9NO3   | OC(=O)CNC(=O)C1=CC=CC=C1        |
|                        | Kynurenate             | 6.927                                                         | C10H7NO3  | OC(=O)C1=NC2=CC=CC=C2C(=C1)O    |
|                        | Pyroglutamate          | 4.158, 4.168, 4.173, 4.183                                    | C5H7NO3   | OC(=O)[C@@H]1CC(=O)N1           |
|                        | Urea                   | 5.740-5.860                                                   | CH4N2O    | NC(N)=O                         |
| amino acids            | Alanine                | 1.464, 1.476                                                  | C3H7NO2   | C[C@H](N)C(O)=O                 |
|                        | Betaine                | 3.252, 3.891                                                  | C5H11NO2  | C[N+](C)(C)CC([O-])=O           |
|                        | Glutamate              | 2.330, 2.335, 2.342, 2.348, 2.355                             | C5H9NO4   | N[C@@H](CCC(O)=O)C(O)=O         |
|                        | Glutamine              | 2.425, 2.436, 2.451, 2.462                                    | C5H10N2O3 | N[C@@H](CCC(N)=O)C(O)=O         |
|                        | Glycine                | 3.554                                                         | C2H5NO2   | NCC(O)=O                        |
|                        | Isoleucine             | 0.994, 1.005                                                  | C6H13NO2  | CC[C@H](C)[C@H](N)C(O)=O        |
|                        | Leucine                | 0.939, 0.950, 0.961                                           | C6H13NO2  | CC(C)C[C@H](N)C(O)=O            |
|                        | Lysine                 | 1.688, 1.700, 1.714, 1.727                                    | C6H14N2O  | NCCCC[C@H](N)C(O)=O             |
|                        | Methionine             | 3.125                                                         | C5H11NO2  | CSCC[C@H](N)C(O)=O              |

|                         |                             |                                     |            |                                                      |
|-------------------------|-----------------------------|-------------------------------------|------------|------------------------------------------------------|
|                         |                             |                                     | S          | =O                                                   |
|                         | N,N-Dimethylglycine         | 2.914,3.714                         | C4H9NO2    | CN(C)CC(O)=O                                         |
|                         | Proline                     | 3.315,3.324,3.335                   | C5H9NO2    | OC(=O)[C@@H]1CCCN1                                   |
|                         | Sarcosine                   | 1.29                                | C3H7NO2    | CNCC(O)=O                                            |
|                         | Taurine                     | 3.409-3.431                         | C2H7NO3S   | NCCS(O)(=O)=O                                        |
|                         | Threonine                   | 1.314,1.324                         | C4H9NO3    | C[C@@H](O)[C@H](N)C(O)=O                             |
|                         | Valine                      | 0.972,0.984                         | C5H11NO2   | CC(C)[C@H](N)C(O)=O                                  |
|                         | trans-4-Hydroxy-L-proline   | 4.324-4.354                         | C5H9NO3    | O[C@H]1CN[C@@H](C1)C(O)=O                            |
|                         | β-Alanine                   | 3.174                               | C3H7NO2    | NCCC(O)=O                                            |
| ammonium compounds      | Choline                     | 3.187                               | C5H14NO    | C[N+](C)(C)CCO                                       |
|                         | Succinate                   | 2.399                               | C4H6O4     | OC(=O)CCC(O)=O                                       |
|                         | Trimethylamine N-oxide      | 3.257                               | C3H9NO     | C[N+](C)(C)[O-]                                      |
|                         | sn-Glycero-3-phosphocholine | 3.213                               | C8H21NO6P  | C[N+](C)(C)CCOP([O-])(=O)OC[C@H](O)CO                |
| food and components     | Dimethyl sulfone            | 3.141                               | C2H6O2S    | C[S](C)(=O)=O                                        |
|                         | Trigonelline                | 4.424,8.810-8.835,8.810-8.835,9.112 | C7H7NO2    | C[N+]1=CC=CC(=C1)C([O-])=O                           |
| nucleic acid components | 5,6-Dihydrouracil           | 2.659,2.671,2.682                   | C4H6N2O2   | O=C1CCNC(=O)N1                                       |
|                         | Cytosine                    | 5.956,5.968                         | C4H5N3O    | NC1=NC(=O)NC=C1                                      |
|                         | Inosine                     | 8.213,8.332                         | C10H12N4O5 | OC[C@H]1O[C@H]([C@H](O)[C@@H]1O)[N]2C=NC3=C2N=CNC3=O |
|                         | Uracil                      | 7.513,7.526                         | C4H4N2O2   | O=C1NC=CC(=O)N1                                      |
| organic acids           | 2-Hydroxyisobutyrate        | 1.349                               | C4H8O3     | CC(C)(O)C(O)=O                                       |
|                         | 2-Oxoglutarate              | 2.421,2.432,2.444                   | C5H6O5     | OC(=O)CCC(=O)C(O)=O                                  |
|                         | 3-Hydroxybutyrate           | 1.185,1.196                         | C4H8O3     | C[C@@H](O)CC(O)=O                                    |
|                         | 3-Hydroxyisobutyrate        | 1.054,1.066                         | C4H8O3     | CC(CO)C(O)=O                                         |

|                    |                        |                                           |           |                                                                                             |
|--------------------|------------------------|-------------------------------------------|-----------|---------------------------------------------------------------------------------------------|
|                    | 3-Hydroxyisovalerate   | 1.26                                      | C5H10O3   | <chem>CC(C)(O)CC(O)=O</chem>                                                                |
|                    | 4-Hydroxyphenylacetate | 6.841,6.855                               | C8H8O3    | <chem>OC(=O)CC1=CC=C(O)C=C1</chem>                                                          |
|                    | Acetate                | 1.912                                     | C2H4O2    | <chem>CC(O)=O</chem>                                                                        |
|                    | Acetoacetate           | 2.27                                      | C4H6O3    | <chem>CC(=O)CC(O)=O</chem>                                                                  |
|                    | Adipate                | 1.54                                      | C6H10O4   | <chem>OC(=O)CCCC(O)=O</chem>                                                                |
|                    | Formate                | 8.447                                     | CH2O2     | <chem>OC=O</chem>                                                                           |
|                    | Fumarate               | 6.512                                     | C4H4O4    | <chem>OC(=O)/C=C/C(O)=O</chem>                                                              |
|                    | Glycolate              | 3.941                                     | C2H4O3    | <chem>OCC(O)=O</chem>                                                                       |
|                    | Isobutyrate            | 1.036,1.048                               | C4H8O2    | <chem>CC(C)C(O)=O</chem>                                                                    |
|                    | Lactate                | 1.316,1.327                               | C3H6O3    | <chem>C[C@H](O)C(O)=O</chem>                                                                |
|                    | Pyruvate               | 4.364                                     | C3H4O3    | <chem>CC(=O)C(O)=O</chem>                                                                   |
|                    | Sebacate               | 1.29                                      | C10H18O4  | <chem>OC(=O)CCCCCCCCC(O)=O</chem>                                                           |
|                    | Sucrose                | 4.202,4.217                               | C12H22O11 | <chem>OC[C@H]1O[C@H](O[C@]2(CO)O[C@H](CO)[C@@H](O)[C@@H]2O)[C@H](O)[C@@H](O)[C@@H]1O</chem> |
|                    | trans-Aconitate        | 6.586                                     | C6H6O6    | <chem>OC(=O)C/C(=C\C(O)=O)C(O)=O</chem>                                                     |
| sugars             | Fucose                 | 1.231,1.242,4.541,4.554                   | C6H12O5   | <chem>C[C@@H]1OC(O)[C@@H](O)[C@H](O)[C@@H]1O</chem>                                         |
|                    | Glucose                | 3.466,3.482,3.497,4.633,4.646,5.224,5.231 | C6H12O6   | <chem>OC[C@H]1O[C@@H](O)[C@H](O)[C@@H](O)[C@@H]1O</chem>                                    |
|                    | Glucuronate            | 5.235,5.241                               | C6H10O7   | <chem>OC1O[C@@H]([C@@H](O)[C@H](O)[C@@H]1O)C(O)=O</chem>                                    |
|                    | Mannose                | 4.893,5.186,5.189                         | C6H12O6   | <chem>OC[C@H]1OC(O)[C@@H](O)[C@@H](O)[C@@H]1O</chem>                                        |
|                    | Xylose                 | 4.563,4.576                               | C5H10O5   | <chem>O[C@@H]1COC(O)[C@H](O)[C@H]1O</chem>                                                  |
| vitamin/co factors | 1-Methylnicotinamide   | 4.452,8.860,8.875,9.250                   | C7H9N2O   | <chem>C[N+]1=CC=CC(=C1)C(N)=O</chem>                                                        |

|  |                      |             |                                                             |                            |
|--|----------------------|-------------|-------------------------------------------------------------|----------------------------|
|  | Niacinamide          | 8.694-8.703 | C <sub>6</sub> H <sub>6</sub> N <sub>2</sub> O              | NC(=O)C1=CC=CN=C1          |
|  | Nicotinamide N-oxide | 8.729       | C <sub>6</sub> H <sub>6</sub> N <sub>2</sub> O <sub>2</sub> | NC(=O)C1=CC=C[N+](=C1)[O-] |

**Table S2** The fold change value of the selected potential biomarkers

| Metabolites name     | Fold change |
|----------------------|-------------|
| Creatine             | 0.010633    |
| Glycine              | 0.12392     |
| Threonine            | 0.1362      |
| Betaine              | 0.46056     |
| Taurine              | 0.50295     |
| Glutamate            | 1.8758      |
| 1-Methylnicotinamide | 0.52155     |

The fold change value of the selected potential biomarker were calculated on a web-based Metaboanalyst 3.0.

(<http://www.metaboanalyst.ca/MetaboAnalyst/faces/ModuleView.xhtml>)
